# Supplementary material for: Targeting integrin αvβ6 with gallium-68 tris (hydroxypyridinone) based PET probes
Source: Royal Society of Chemistry journal article supplement (doi:10.1039/d2dt00980c), 2022-01-01
Supplement: d2dt00980c1.pdf [file d2dt00980c1.pdf]

## Targeting Integrin $\alpha\beta6$ with Gallium-68 tris(hydroxypyridinone) based PET Probes

Giuseppe Floresta,<sup>a,b</sup> Siham Memdouh,<sup>a</sup> Truc Pham,<sup>c</sup> Michelle T. Ma,<sup>c</sup> Philip J. Blower,<sup>c</sup> Robert C. Hider,<sup>a</sup> Vincenzo Abbate,<sup>a</sup> Agostino Cilibrizzi<sup>a,d\*</sup>

<sup>a</sup>King's College London, Institute of Pharmaceutical Science, Franklin Wilkins Building, London SE1 9NH, United Kingdom

<sup>b</sup>Department of Drug and Health Sciences, University of Catania, Catania, Italy

<sup>c</sup>King's College London, Division of Imaging Sciences and Biomedical Engineering, Fourth Floor Lambeth Wing, St Thomas' Hospital, London SE1 7EH, United Kingdom

<sup>d</sup>Centre for Therapeutic Innovation, University of Bath, Bath, UK

### Table of contents

|                                                                                                                                                                     |    |
|---------------------------------------------------------------------------------------------------------------------------------------------------------------------|----|
| <b>Figure S1.</b> iTLCs chromatograms for molecule <b>12</b>                                                                                                        | 2  |
| <b>Figure S2.</b> radioHPLC chromatogram for molecule <b>12</b>                                                                                                     | 2  |
| <b>Figure S3.</b> radioHPLC chromatogram for molecule <b>11</b>                                                                                                     | 3  |
| <b>Table S1.</b> Method 1 for radio HPLC                                                                                                                            | 3  |
| <b>Figure S4.</b> Structure, HPLC chromatogram (281 nm) and mass spectrum (ESI <sup>+</sup> ) of molecule <b>7</b>                                                  | 4  |
| <b>Figure S5.</b> <sup>1</sup> H NMR of molecule <b>7</b>                                                                                                           | 5  |
| <b>Figure S6.</b> Mass spectrum (ESI <sup>+</sup> ) and structure of <b>9</b>                                                                                       | 6  |
| <b>Figure S7.</b> Structure, HPLC chromatogram (PDA) and mass spectrum (ESI <sup>+</sup> ) of molecule <b>10</b>                                                    | 7  |
| <b>Figure S8.</b> Structure, HPLC chromatogram (281 nm) and mass spectrum (ESI <sup>+</sup> ) of molecule <b>11</b>                                                 | 8  |
| <b>Figure S9.</b> High-resolution full scan ESI <sup>+</sup> MS spectra of the compound <b>11</b> and a zoom view of the isotopic pattern of the precursor product  | 9  |
| <b>Figure S10.</b> Product ion spectrum ( <b>11</b> ) from the AIF at collision energy 30                                                                           | 10 |
| <b>Figure S11.</b> Structure, HPLC chromatogram (PDA) and mass spectrum (ESI <sup>+</sup> ) of molecule <b>12</b>                                                   | 11 |
| <b>Figure S12.</b> High-resolution full scan ESI <sup>+</sup> MS spectra of the compound <b>12</b> and a zoom view of the isotopic pattern of the precursor product | 12 |
| <b>Figure S13.</b> Product ion spectrum ( <b>12</b> ) from the AIF at collision energy 30                                                                           | 13 |
| <b>Figure S14.</b> <sup>1</sup> H NMR of molecule <b>11</b>                                                                                                         | 14 |
| <b>Figure S15.</b> <sup>1</sup> H- <sup>1</sup> H COSY NMR of molecule <b>11</b>                                                                                    | 14 |
| <b>Figure S16.</b> <sup>1</sup> H- <sup>13</sup> C HSQC NMR of molecule <b>11</b>                                                                                   | 15 |
| <b>Figure S17.</b> <sup>1</sup> H NMR of molecule <b>12</b>                                                                                                         | 16 |
| <b>Figure S18.</b> <sup>1</sup> H- <sup>1</sup> H COSY NMR of molecule <b>12</b>                                                                                    | 16 |
| <b>Figure S19.</b> <sup>1</sup> H- <sup>13</sup> C HSQC NMR of molecule <b>12</b>                                                                                   | 17 |
| <b>Tables S1-S2.</b> Nonlinear regression results and statistics for molecules <b>11</b> and <b>12</b>                                                              | 18 |

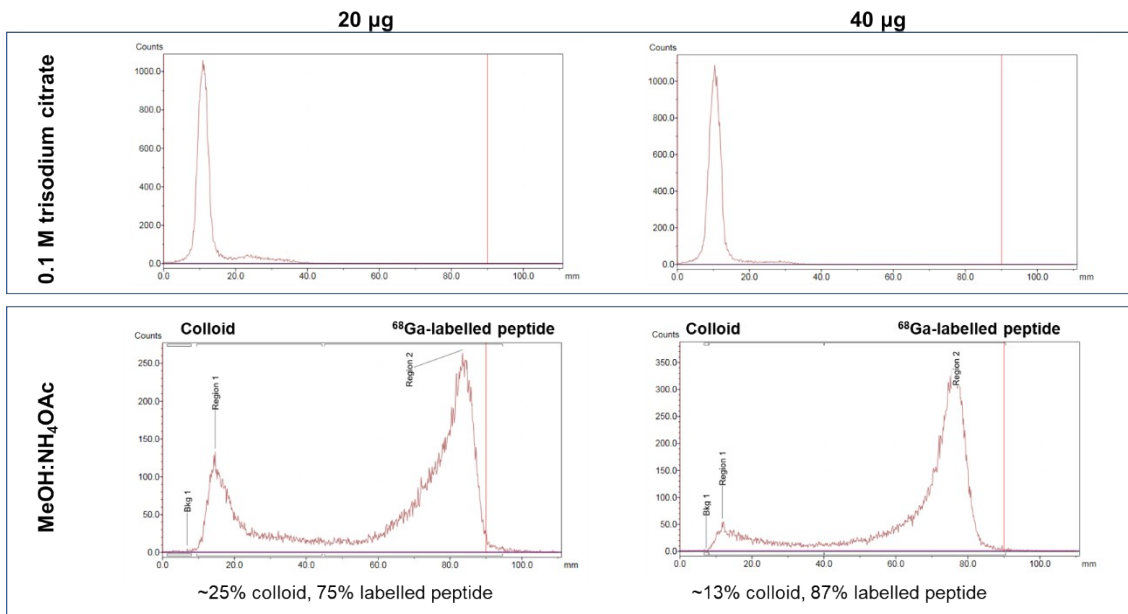

Figure S1. iTLCs chromatograms for molecule 12.

Chromatogram: PET

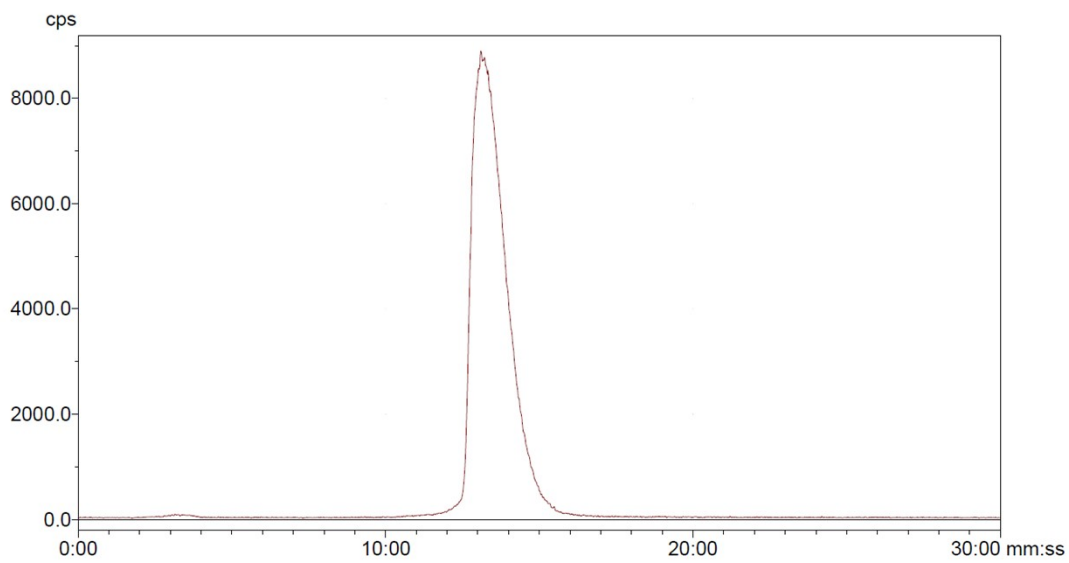

Figure S2. radioHPLC chromatogram for molecule 12.

Chromatogram: PET

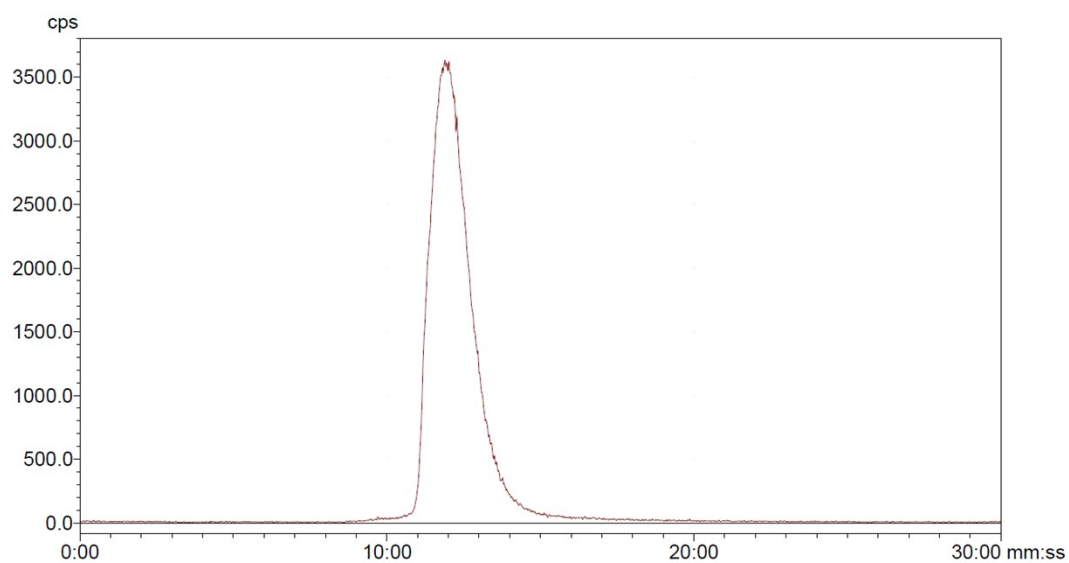

**Figure S3.** radioHPLC chromatogram for molecule **11**.

**Table S1.** Method 1 for radio HPLC: A = water + 0.1% trifluoroacetic acid. B = acetonitrile + 0.1% trifluoroacetic acid. Flow rate: 0.3 mL/min.

| Time / min | Solvent % |    |
|------------|-----------|----|
|            | A         | B  |
| 0          | 100       | 0  |
| 20         | 10        | 90 |
| 23         | 10        | 90 |
| 25         | 100       | 0  |
| 30         | 100       | 0  |

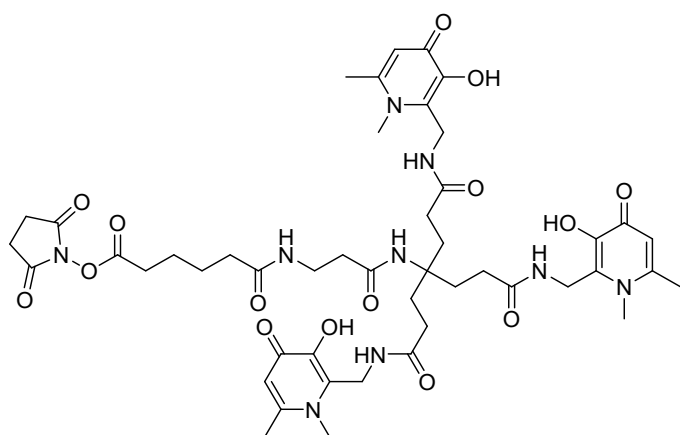

Chemical Formula:  $C_{47}H_{63}N_9O_{15}$   
 Exact Mass: 993.4444

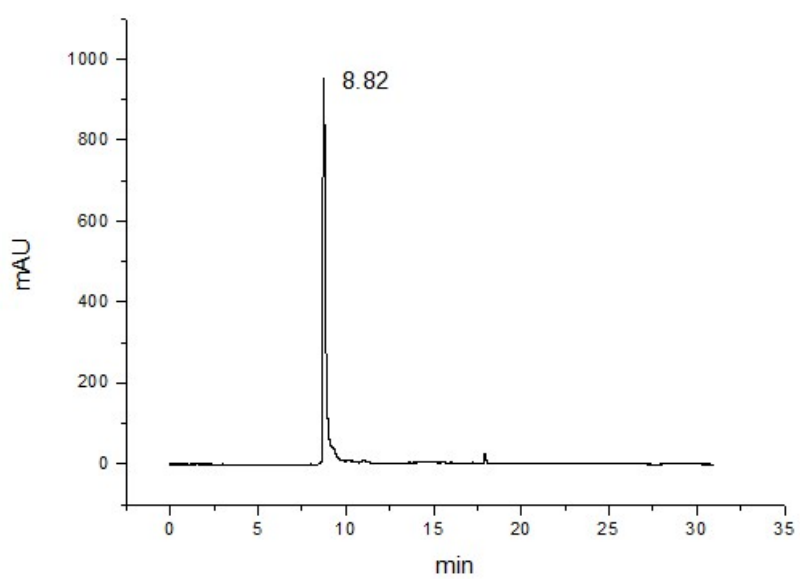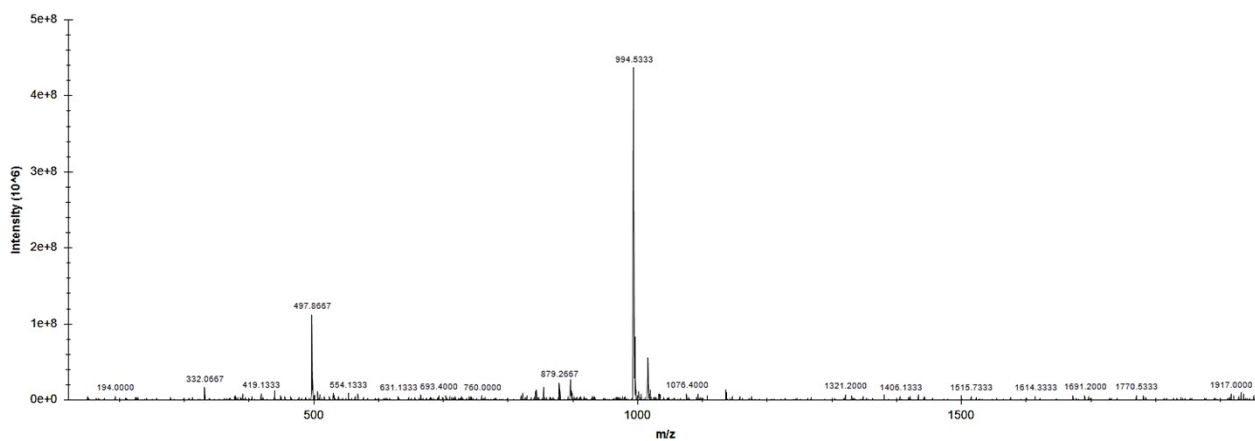

**Figure S4.** Structure, HPLC chromatogram (281 nm) and mass spectrum (ESI<sup>+</sup>) of molecule 7.

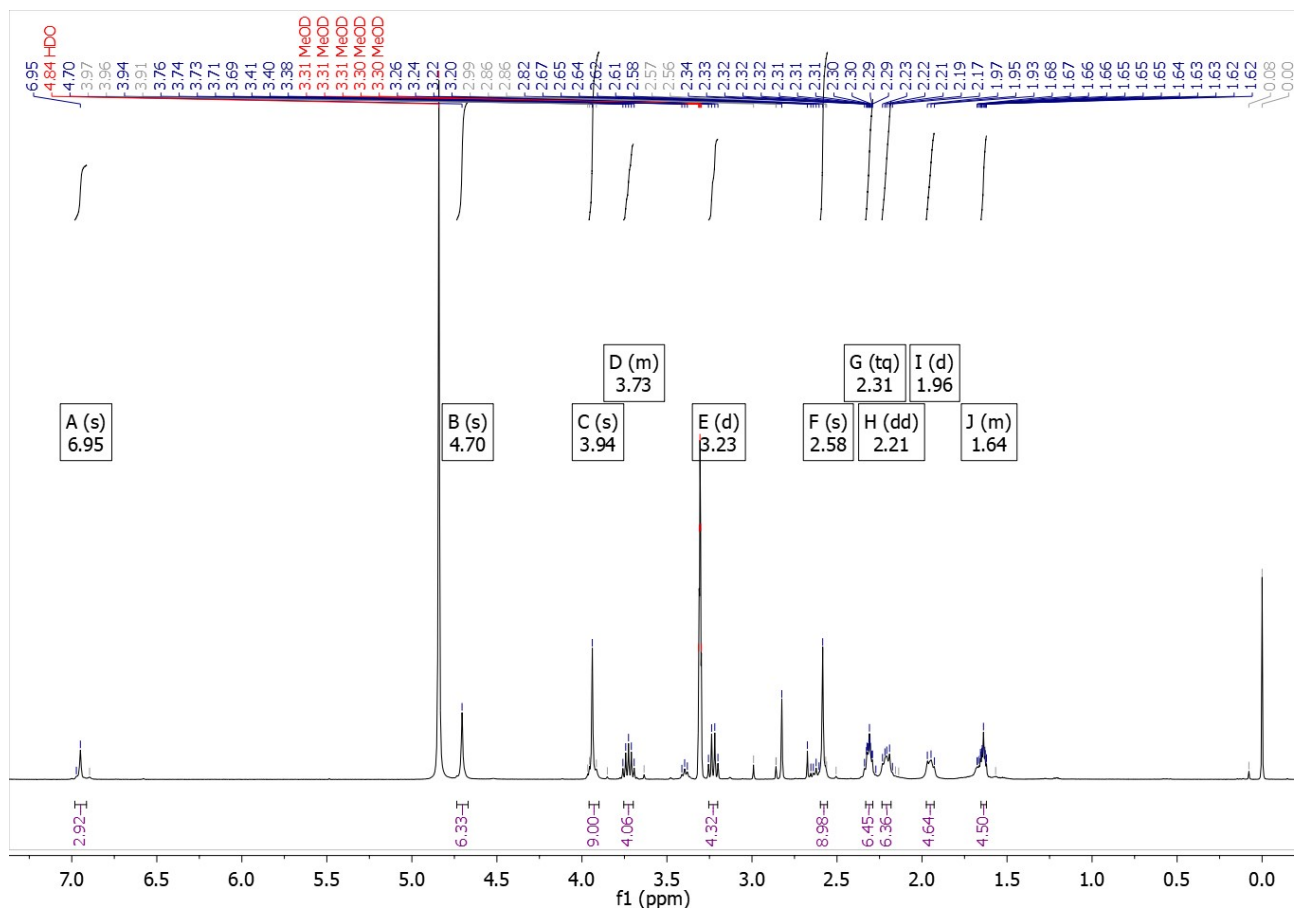

Figure S5. <sup>1</sup>H NMR of molecule 7.

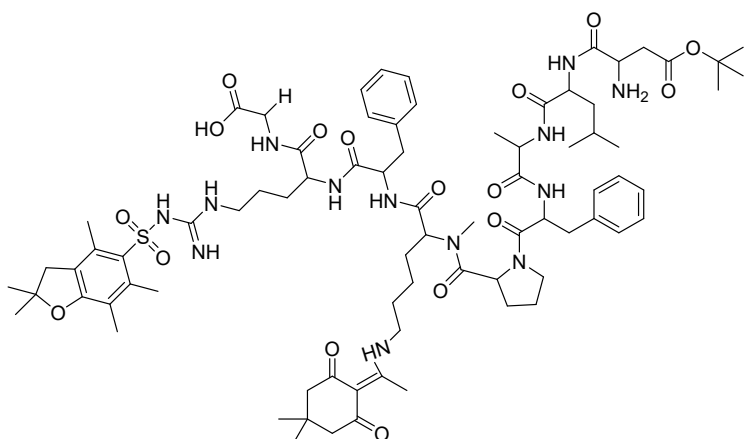

Chemical Formula:  $C_{78}H_{113}N_{13}O_{17}S$   
Exact Mass: 1535.8098

040918\_01 #465 RT: 11.89 AV: 1 NL: 4.17E9  
F: +c ESI Full ms [150.00-2000.00]

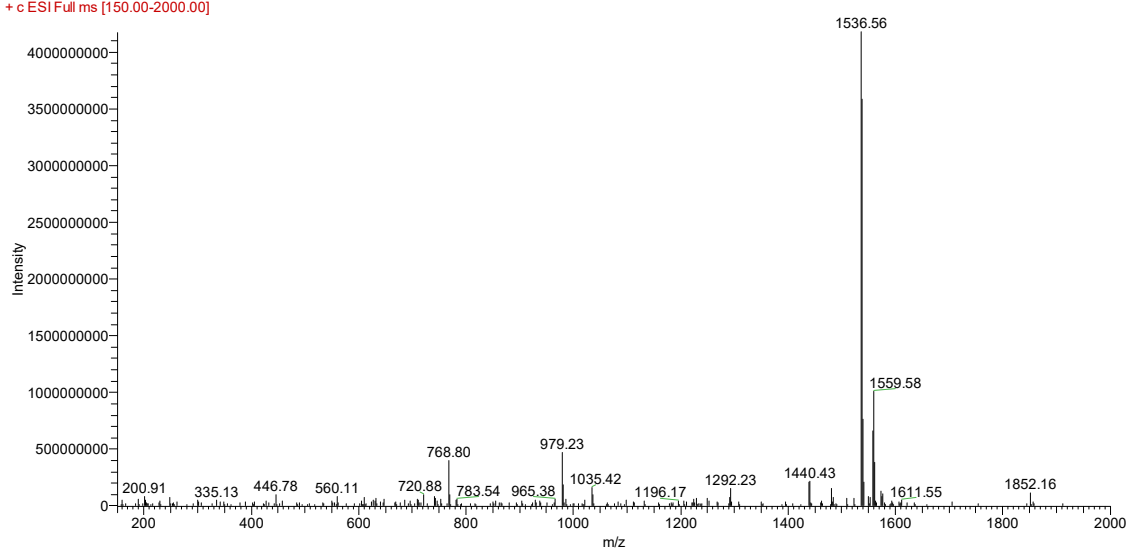

Figure S6. Mass spectrum (ESI+) and structure of 9.

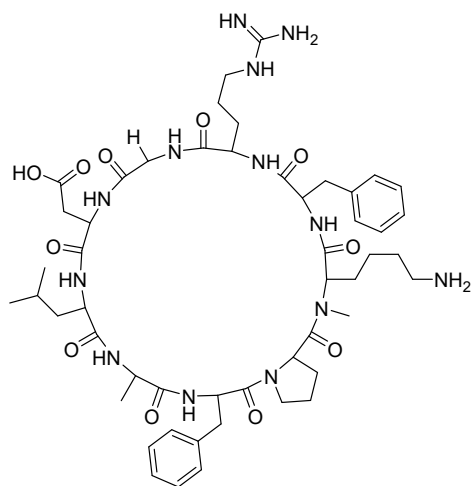

Chemical Formula: C<sub>51</sub>H<sub>75</sub>N<sub>13</sub>O<sub>11</sub>  
 Exact Mass: 1045.5709

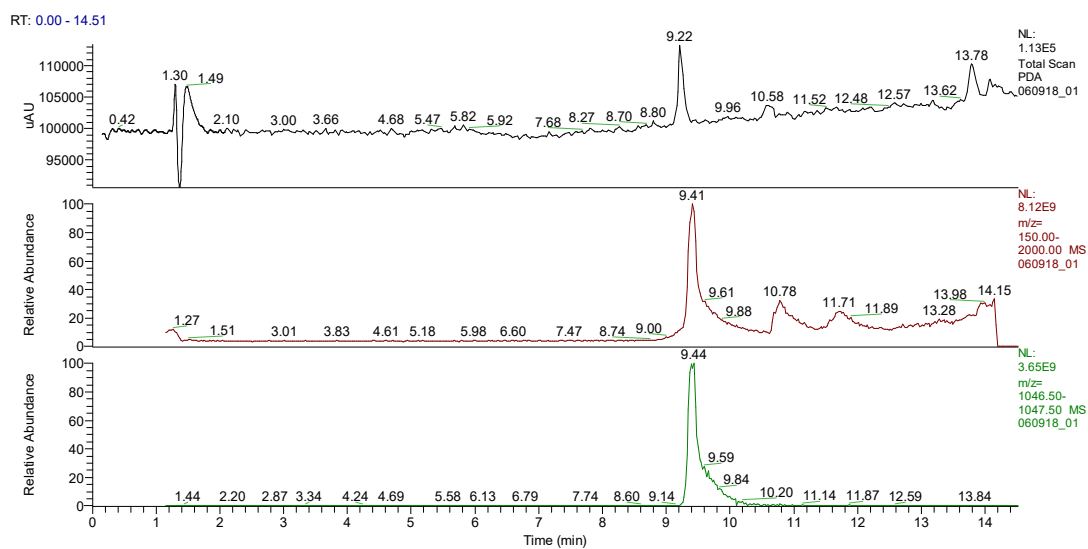

060918\_01 #355 RT: 9.52 AV: 1 NL: 1.19E9  
 T: + c ESI Full ms [150.00-2000.00]

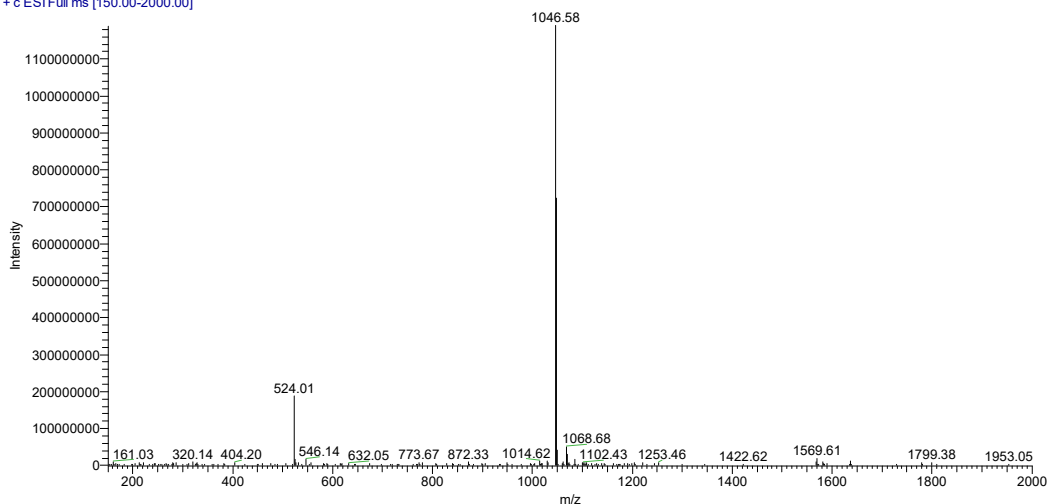

Figure S7. Structure, HPLC chromatogram (PDA) and mass spectrum (ESI<sup>+</sup>) of molecule 10.

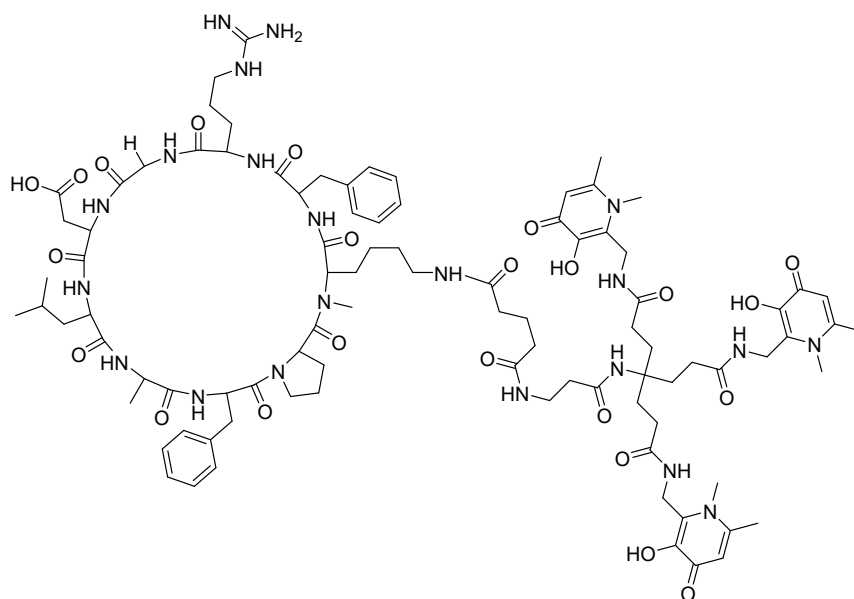

Chemical Formula:  $C_{93}H_{131}N_{21}O_{23}$   
 Exact Mass: 1909.9727

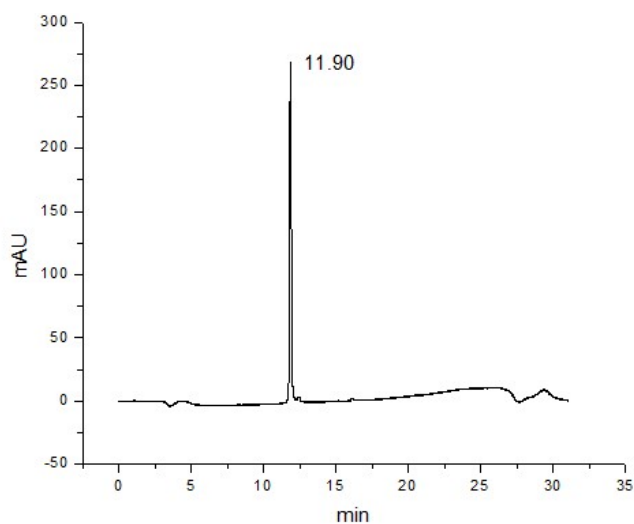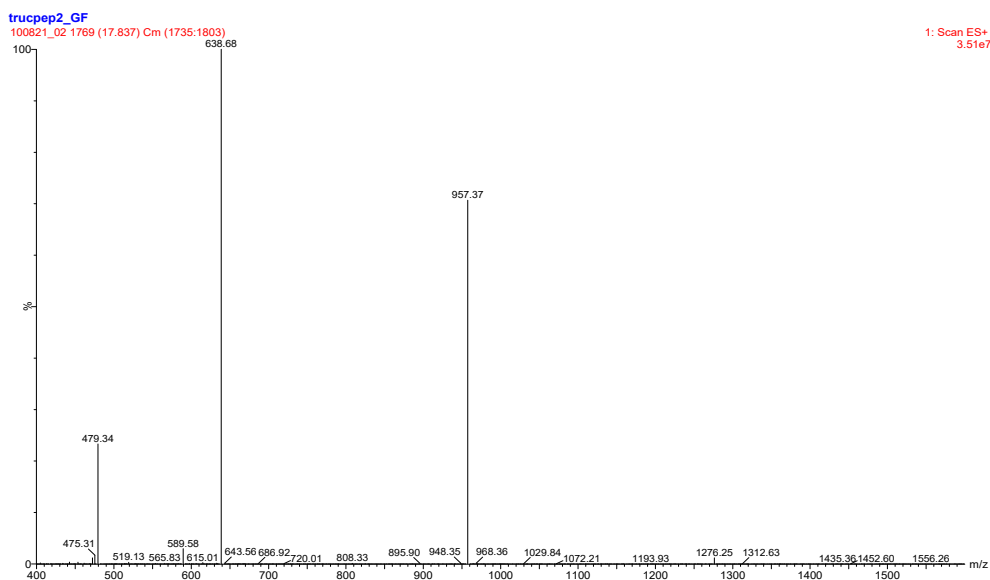

Figure S8. Structure, HPLC chromatogram (281 nm) and mass spectrum (ESI<sup>+</sup>) of molecule 11.



BP25 GLU #36-208 RT: 0.08-0.49 AV: 173 NL: 1.50E7

T: FTMS + p ESI Full ms [400.0000-2000.0000]

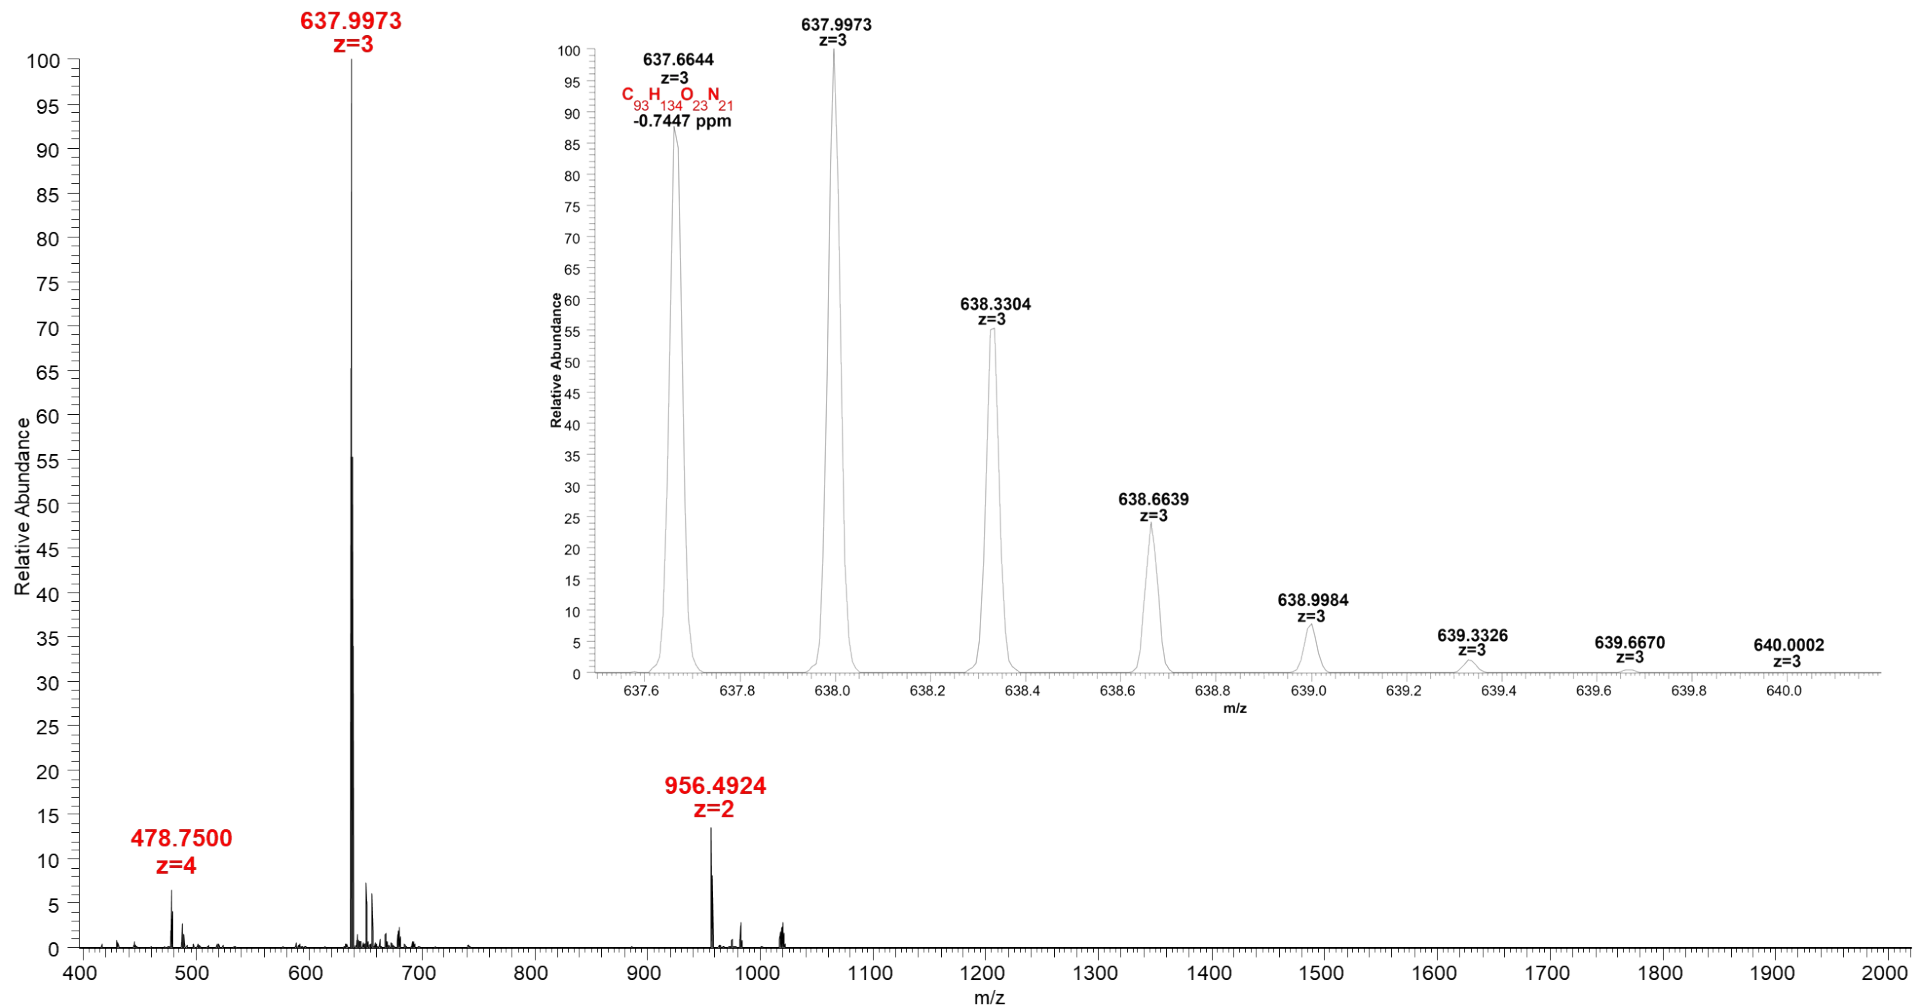

Figure S9. High-resolution full scan ESI+ MS spectra of the compound 11 and a zoom view of the isotopic pattern of the precursor product

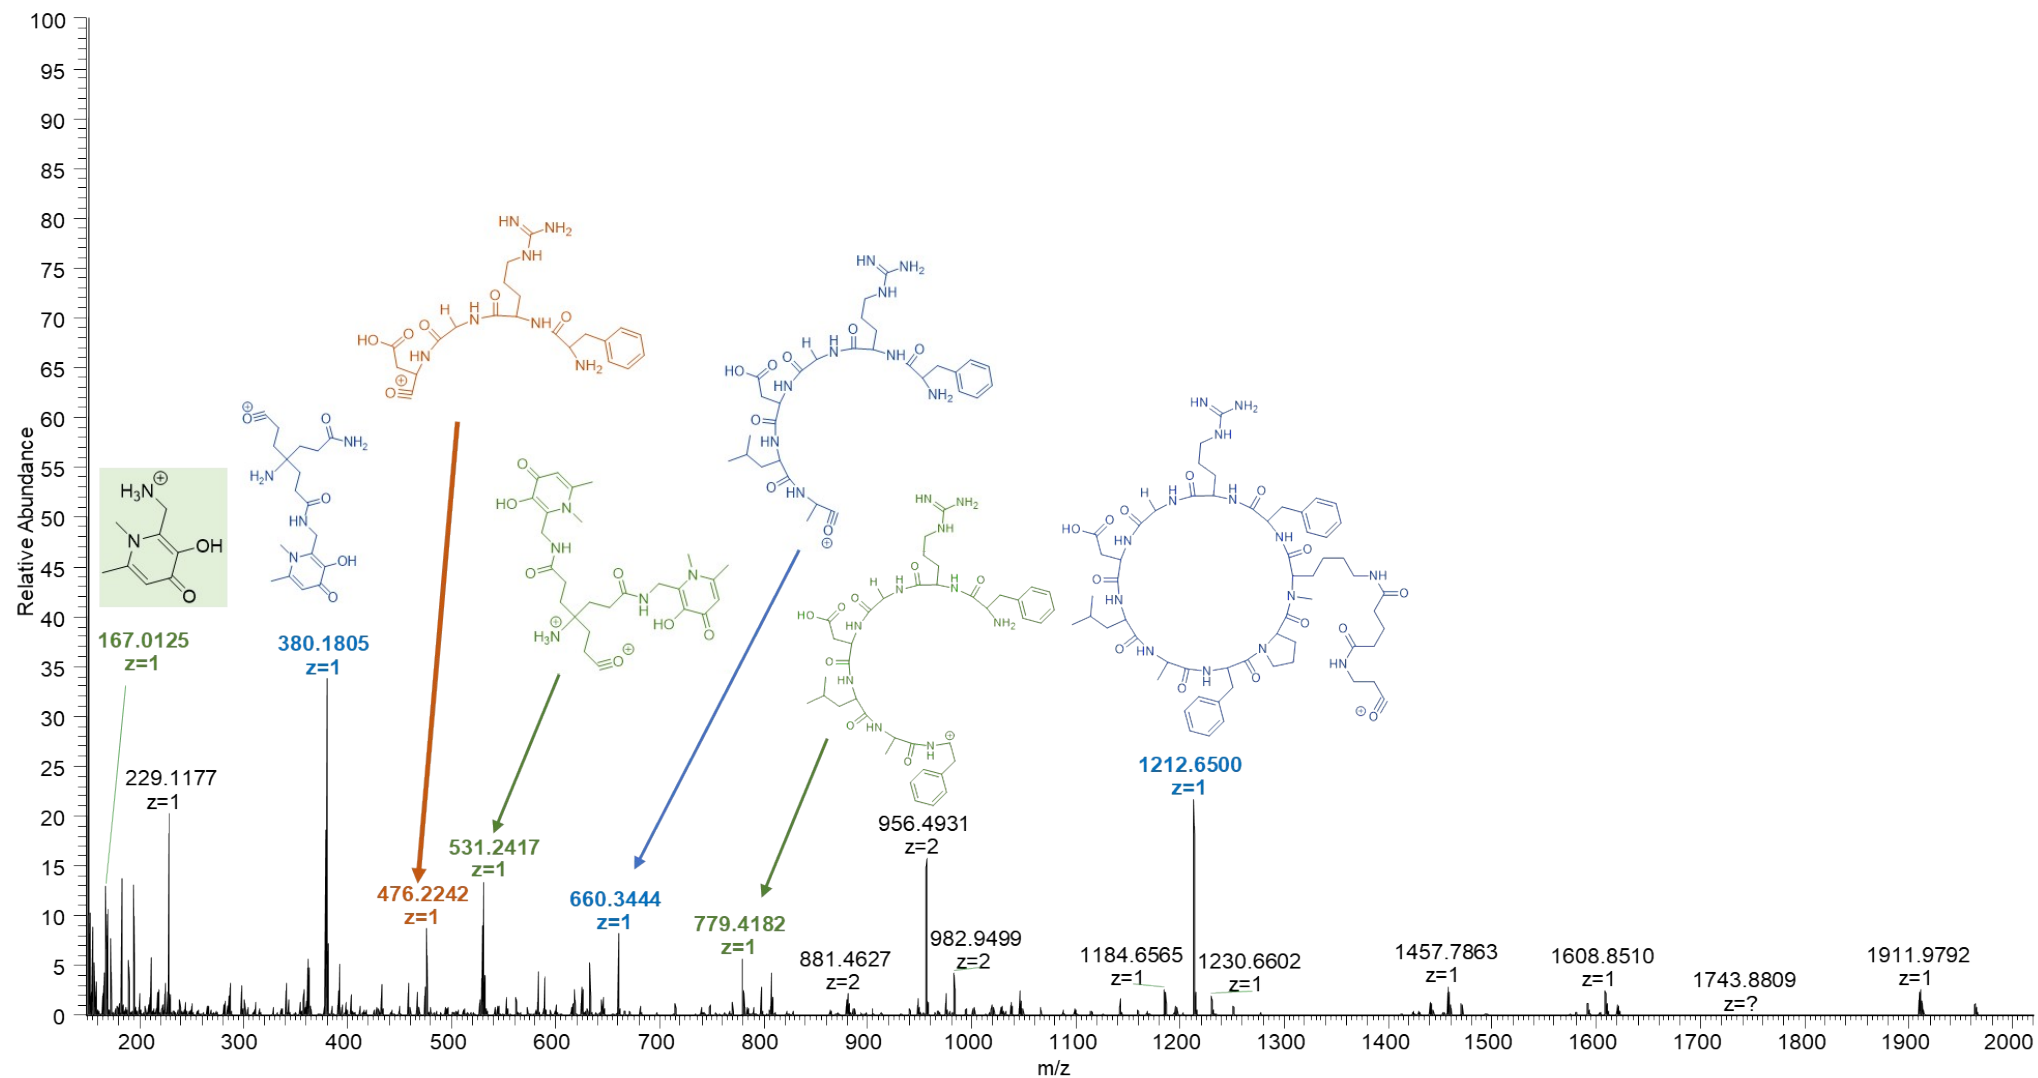

Figure S10. Product ion spectrum from the AIF at collision energy 30

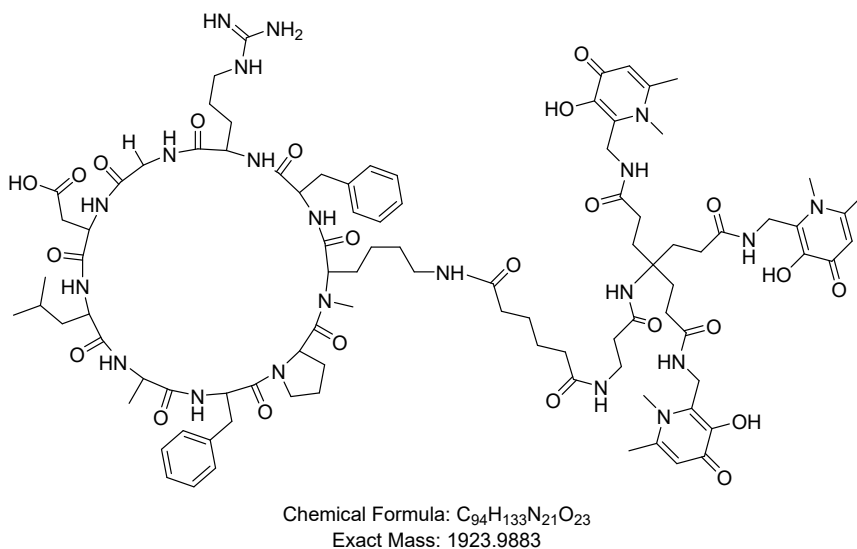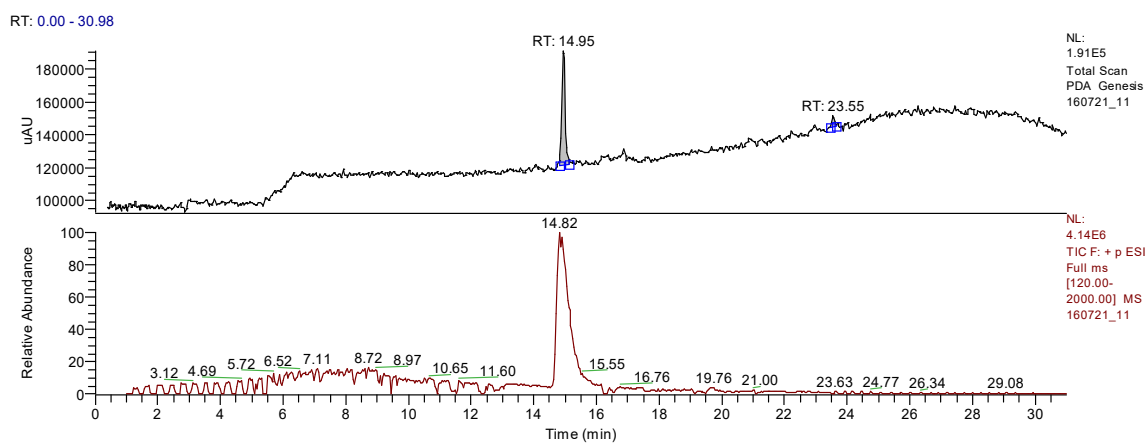

160721\_11 #371-398 RT: 14.53-15.52 AV: 28 NL: 4.22E4  
F: + p ESI Full ms [120.00-2000.00]

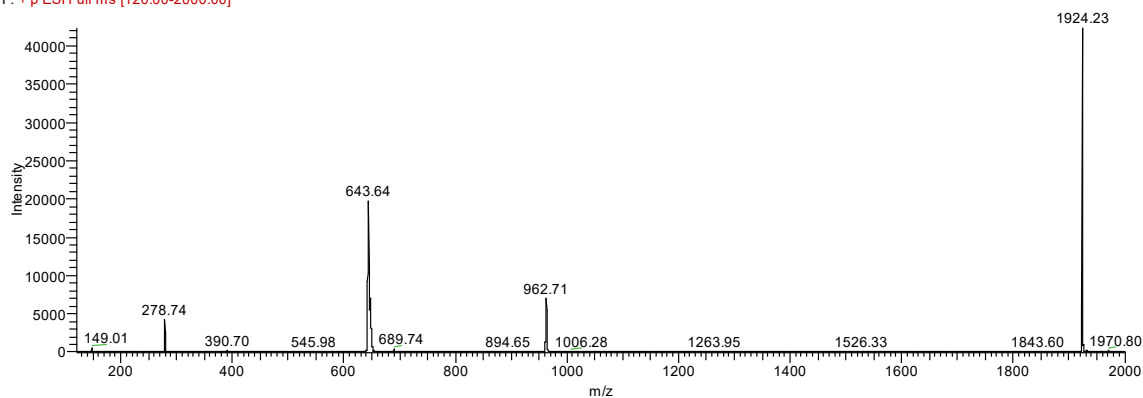

**Figure S11.** Structure, HPLC chromatogram (281 nm) and mass spectrum (ESI<sup>+</sup>) of molecule **12**.

BP25 ADI #16-211 RT: 0.04-0.49 AV: 196 NL: 6.97E6

T: FTMS + p ESI Full ms [400.0000-2000.0000]

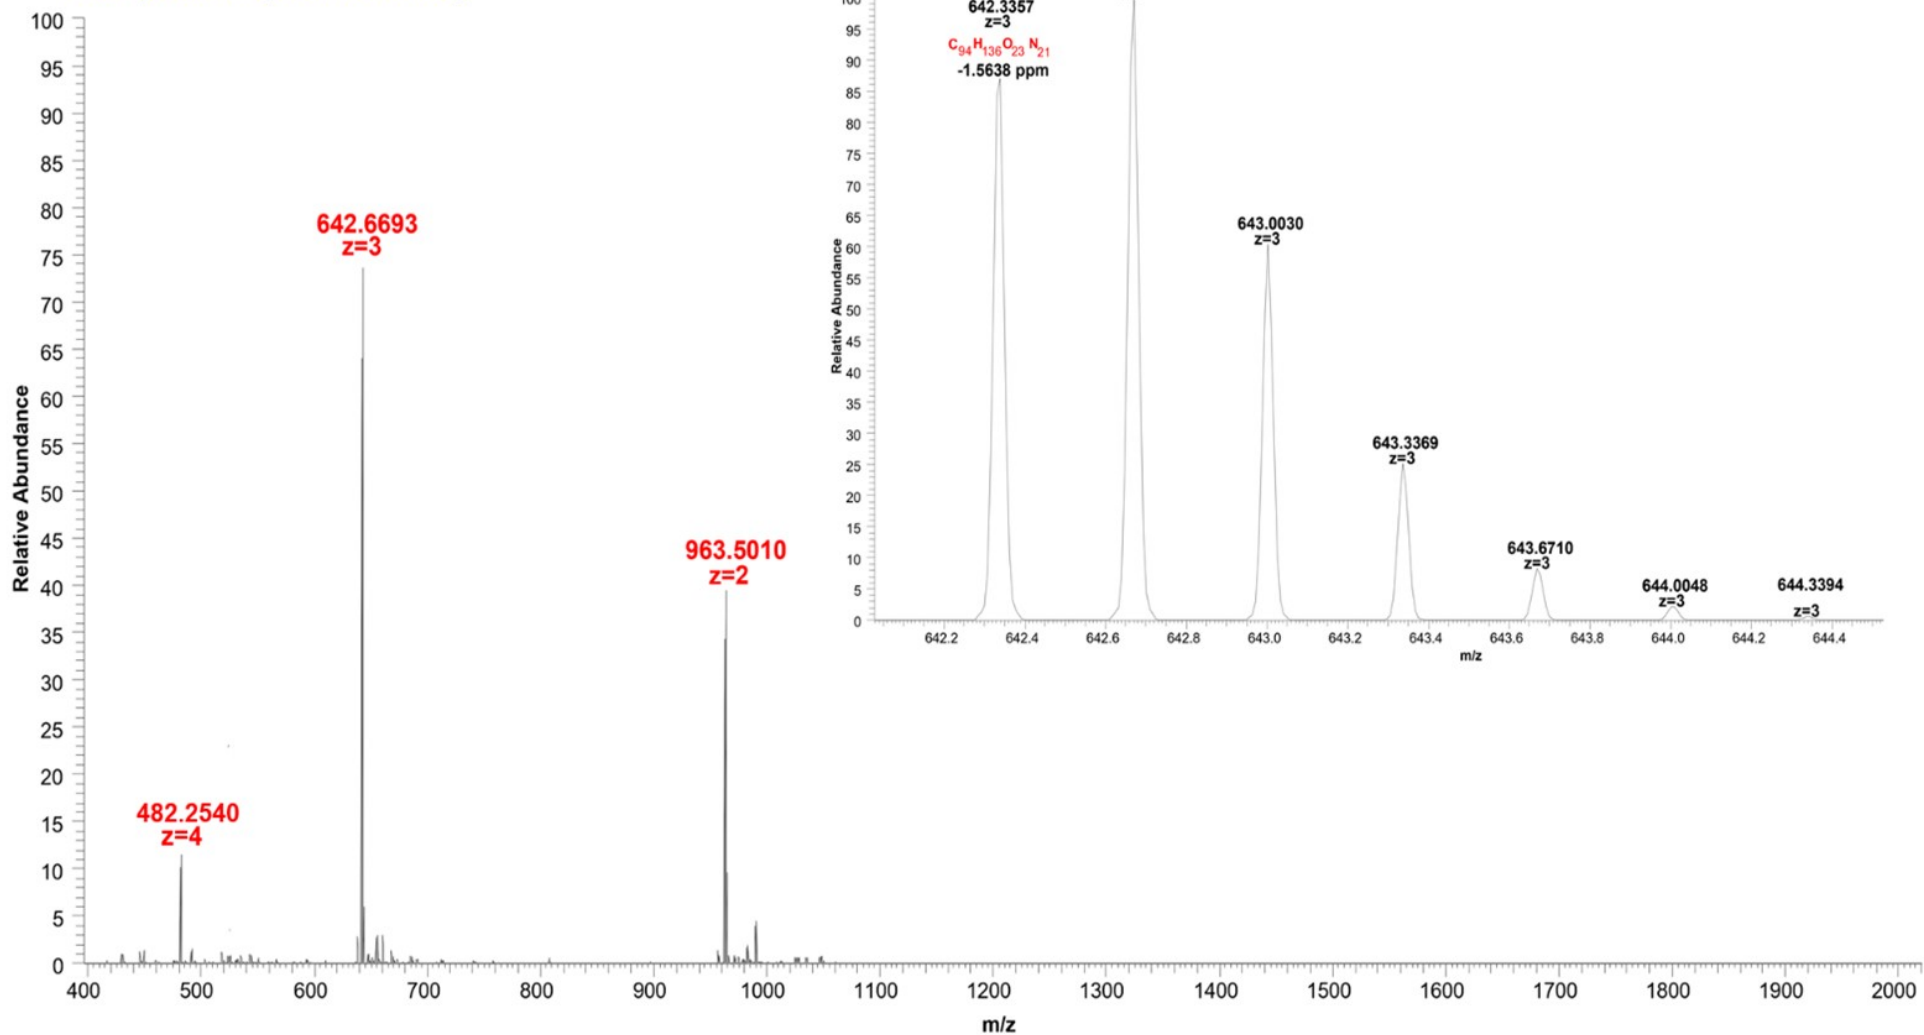

Figure S12. High-resolution full scan ESI+ MS spectra of the compound 12 and a zoom view of the isotopic pattern of the precursor product

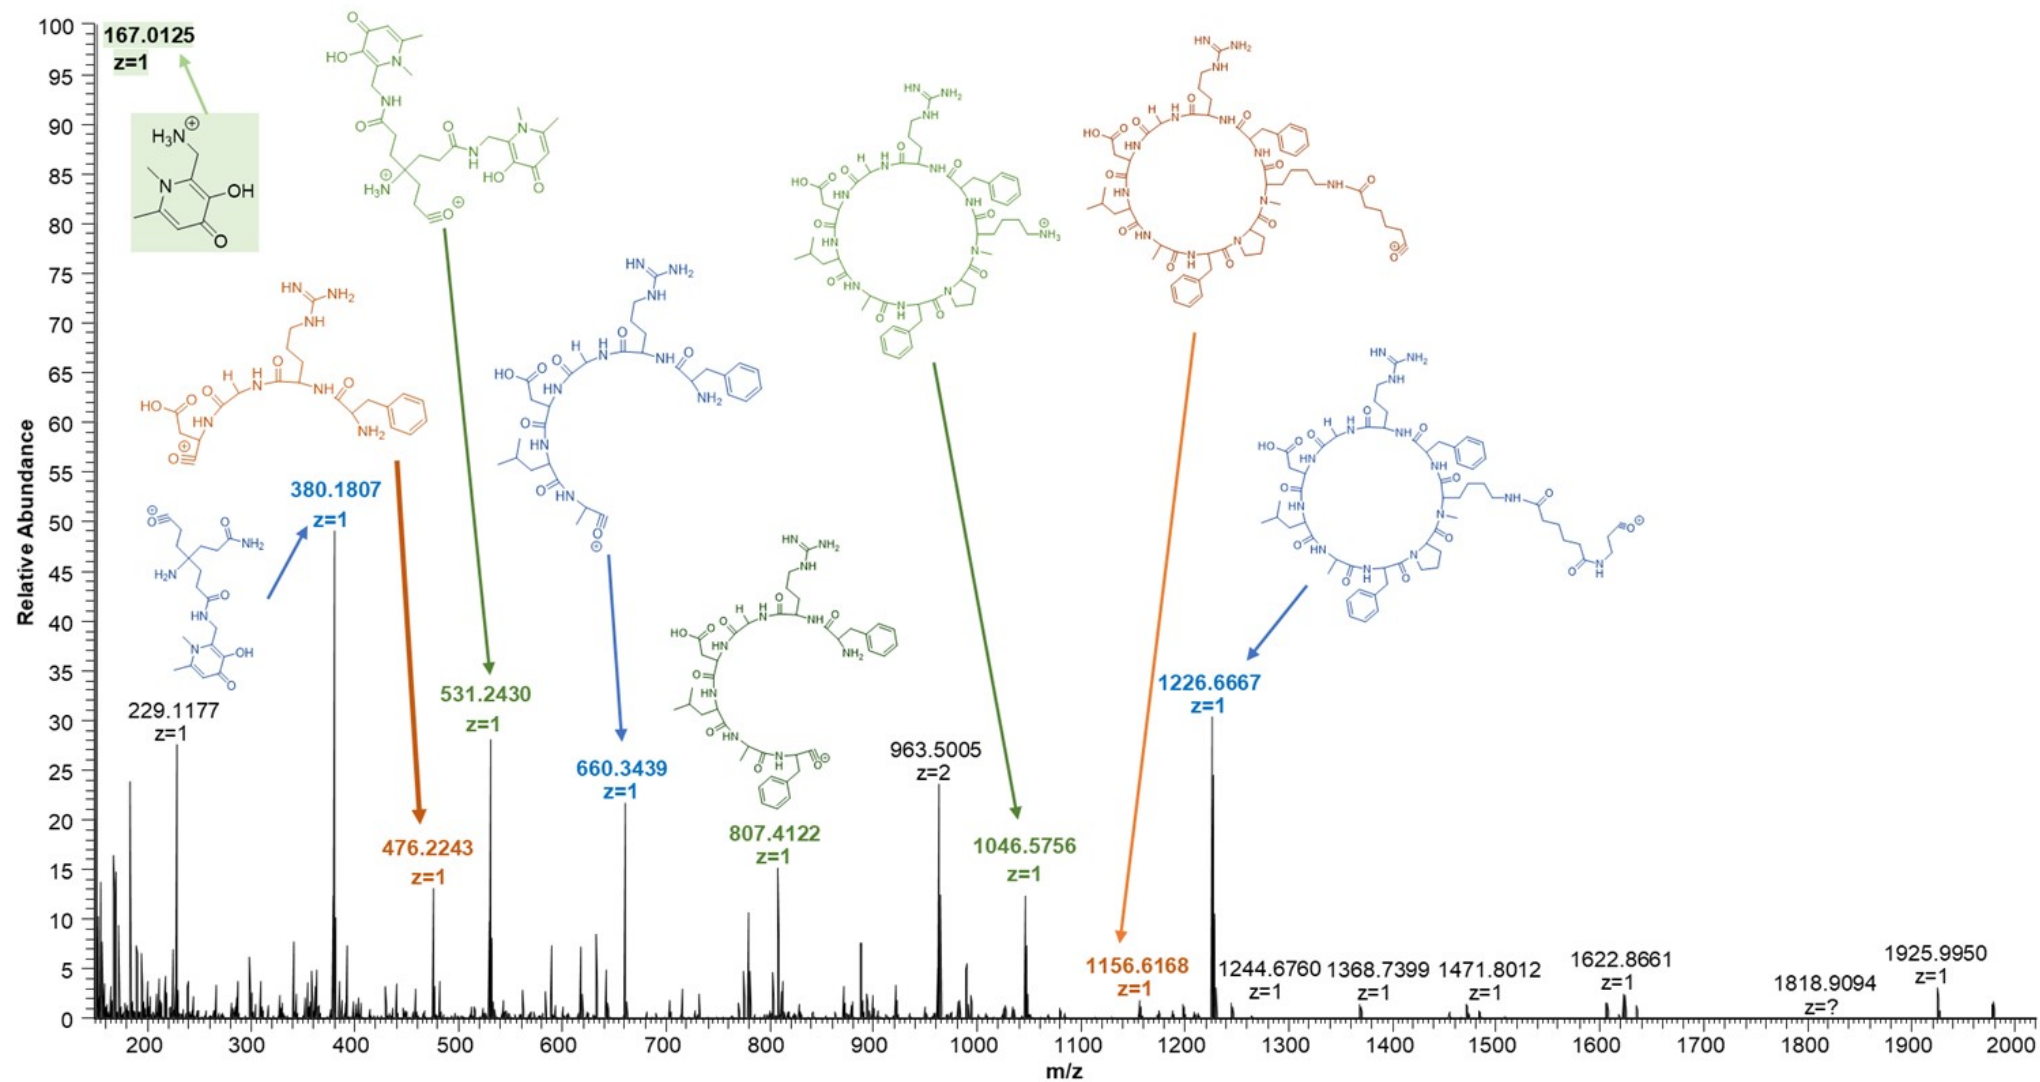

Figure S13. Product ion spectrum from the AIF at collision energy 30

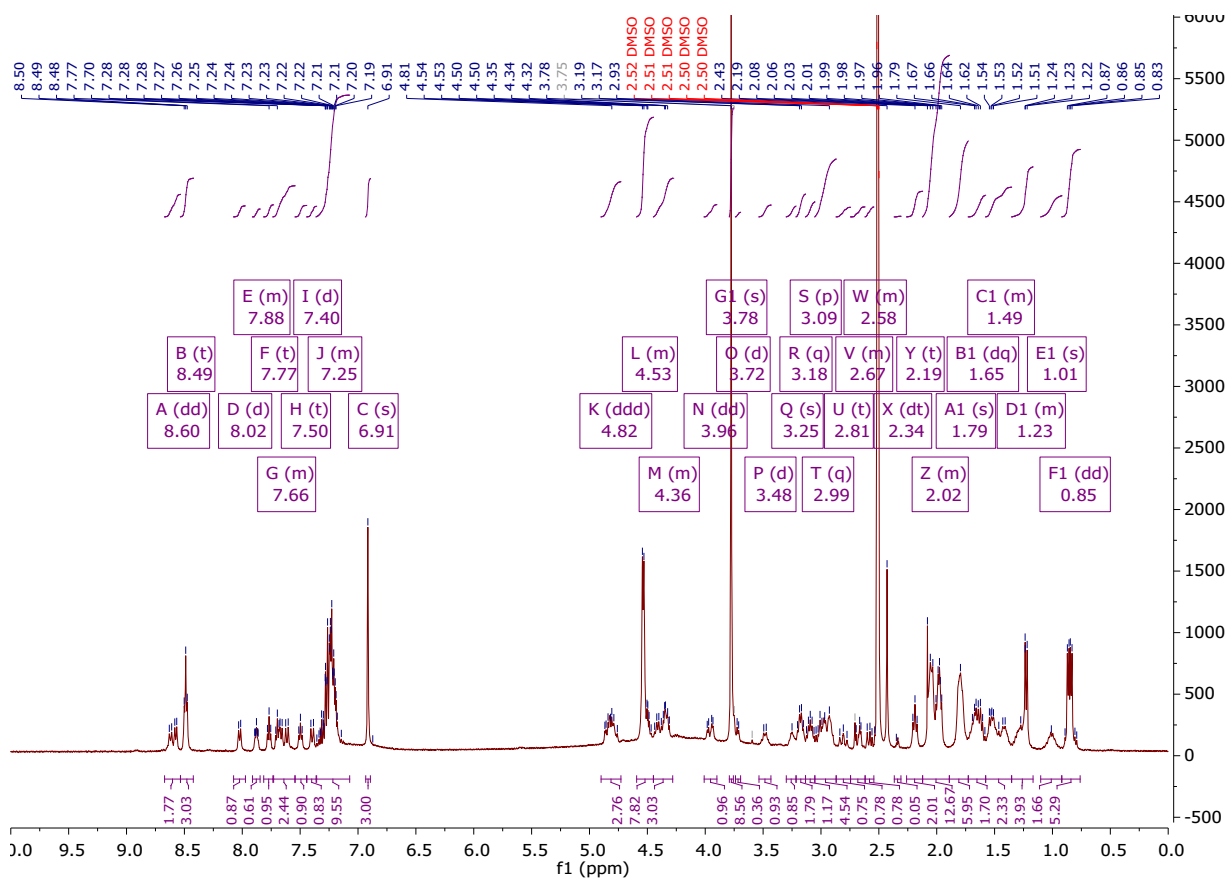

Figure S14.  $^1\text{H}$  NMR of molecule 11.

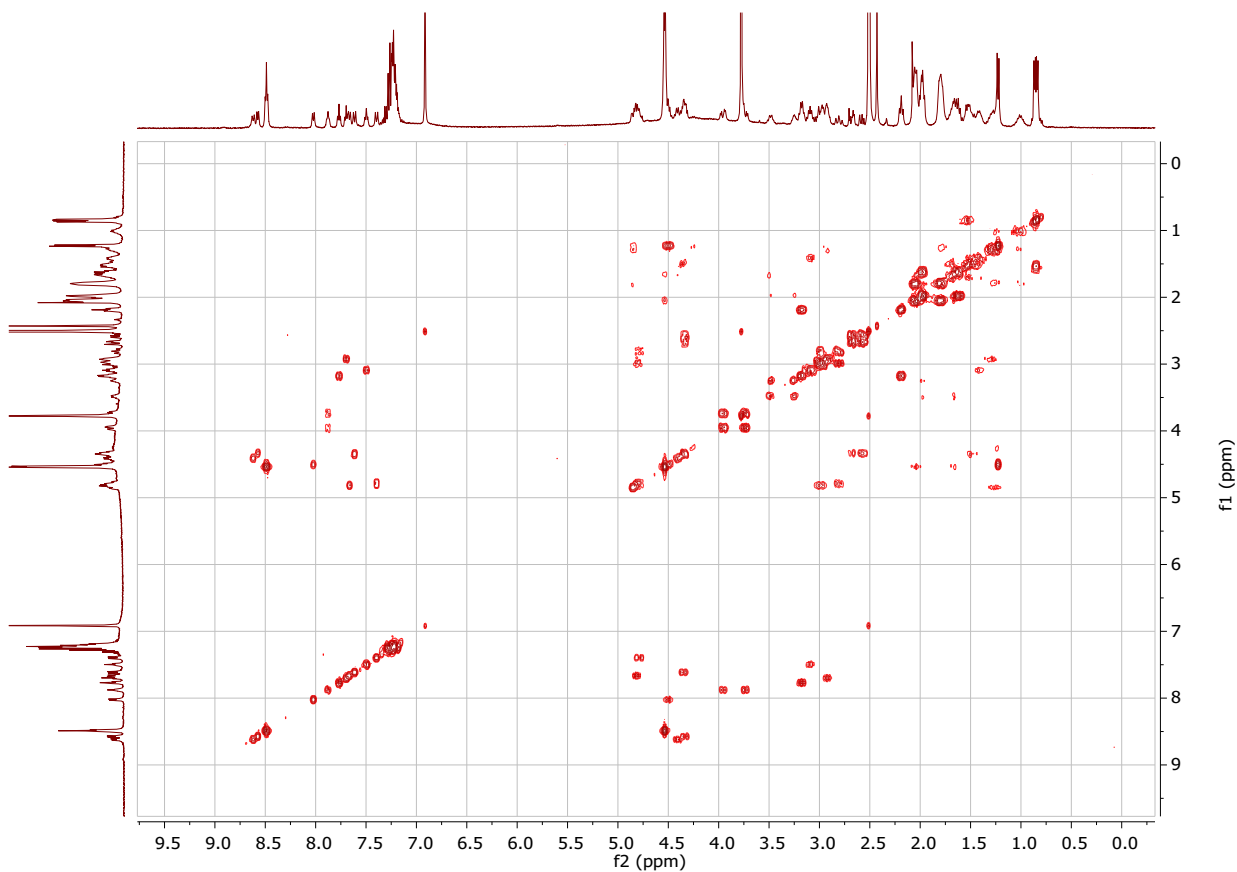

Figure S15.  $^1\text{H}$ - $^1\text{H}$  COSY NMR of molecule 11.

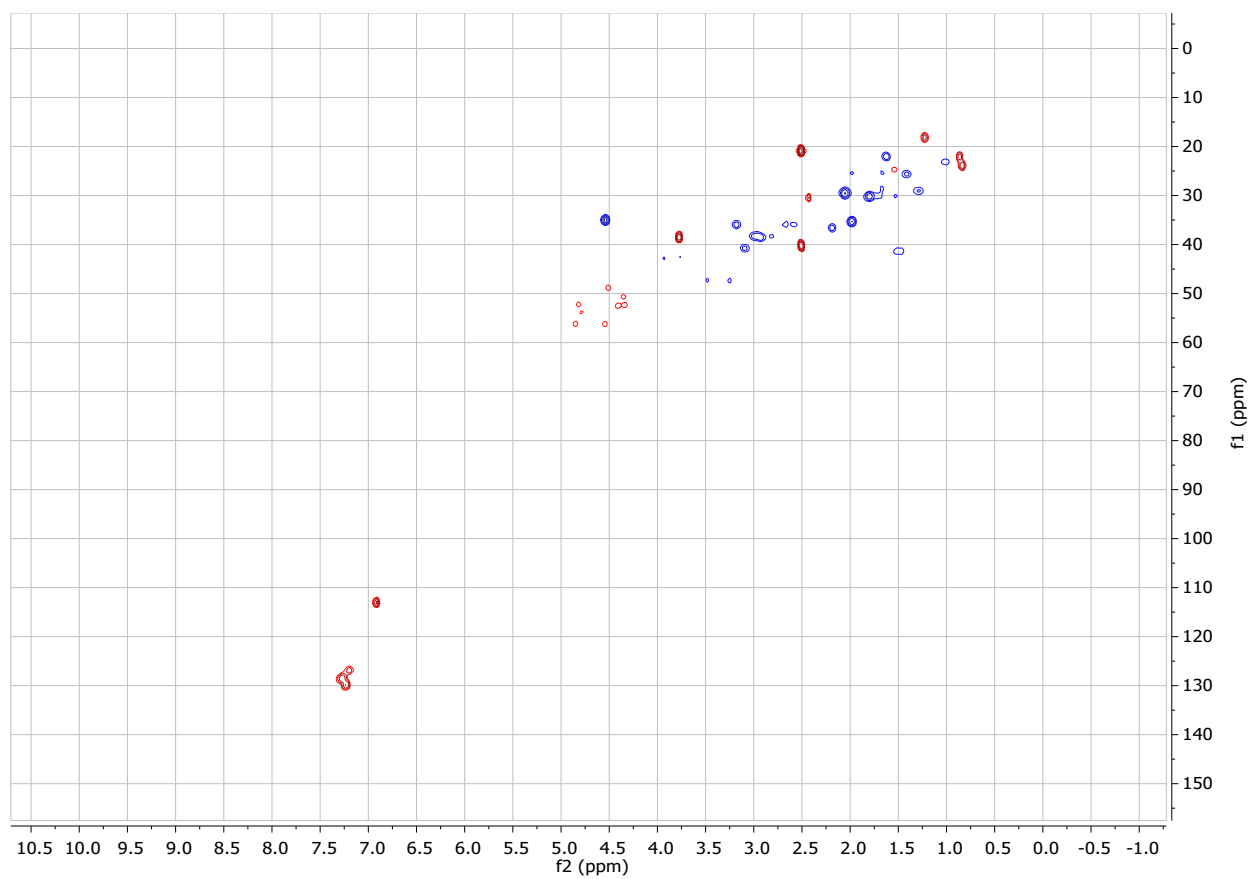

**Figure S16.**  $^1\text{H}$ - $^{13}\text{C}$  HSQC NMR of molecule **11**.

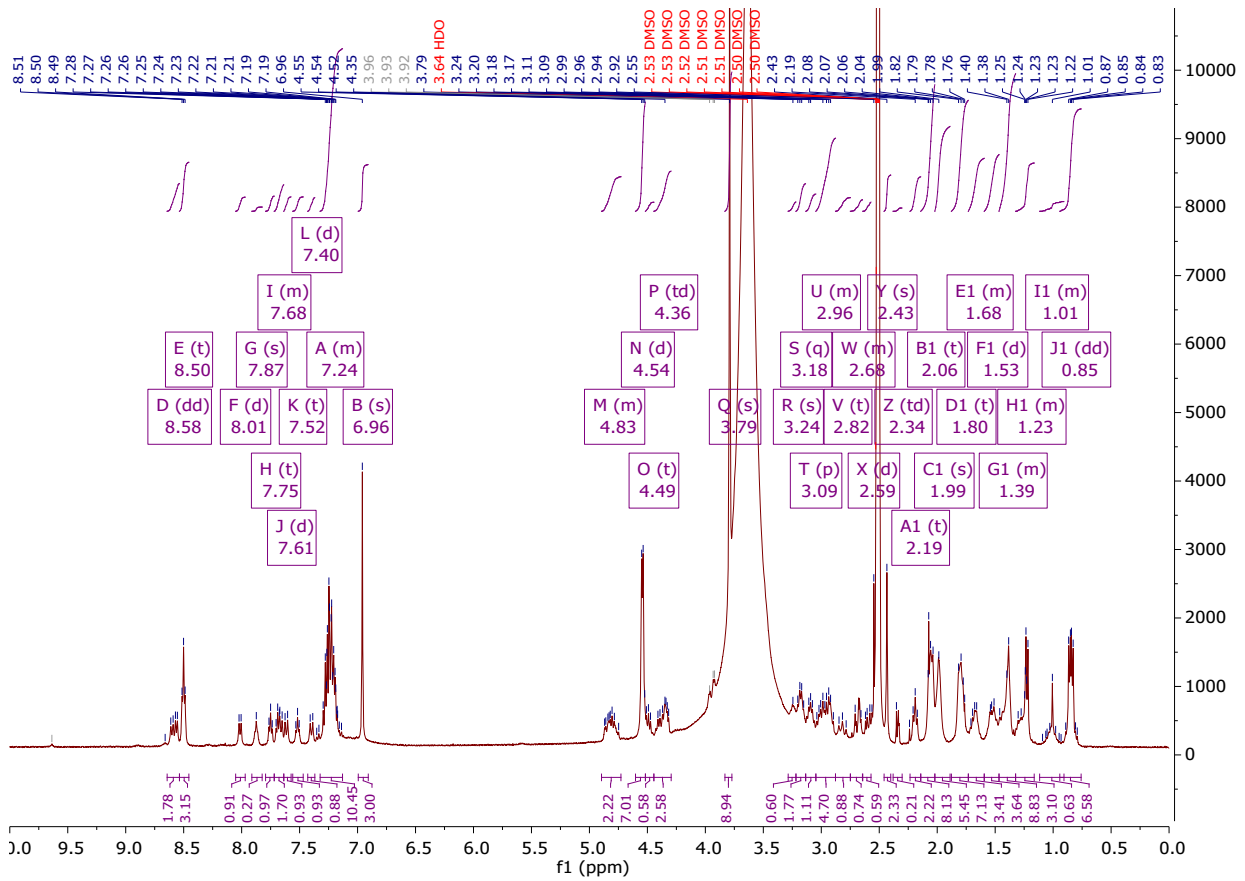

Figure S17. <sup>1</sup>H NMR of molecule 12.

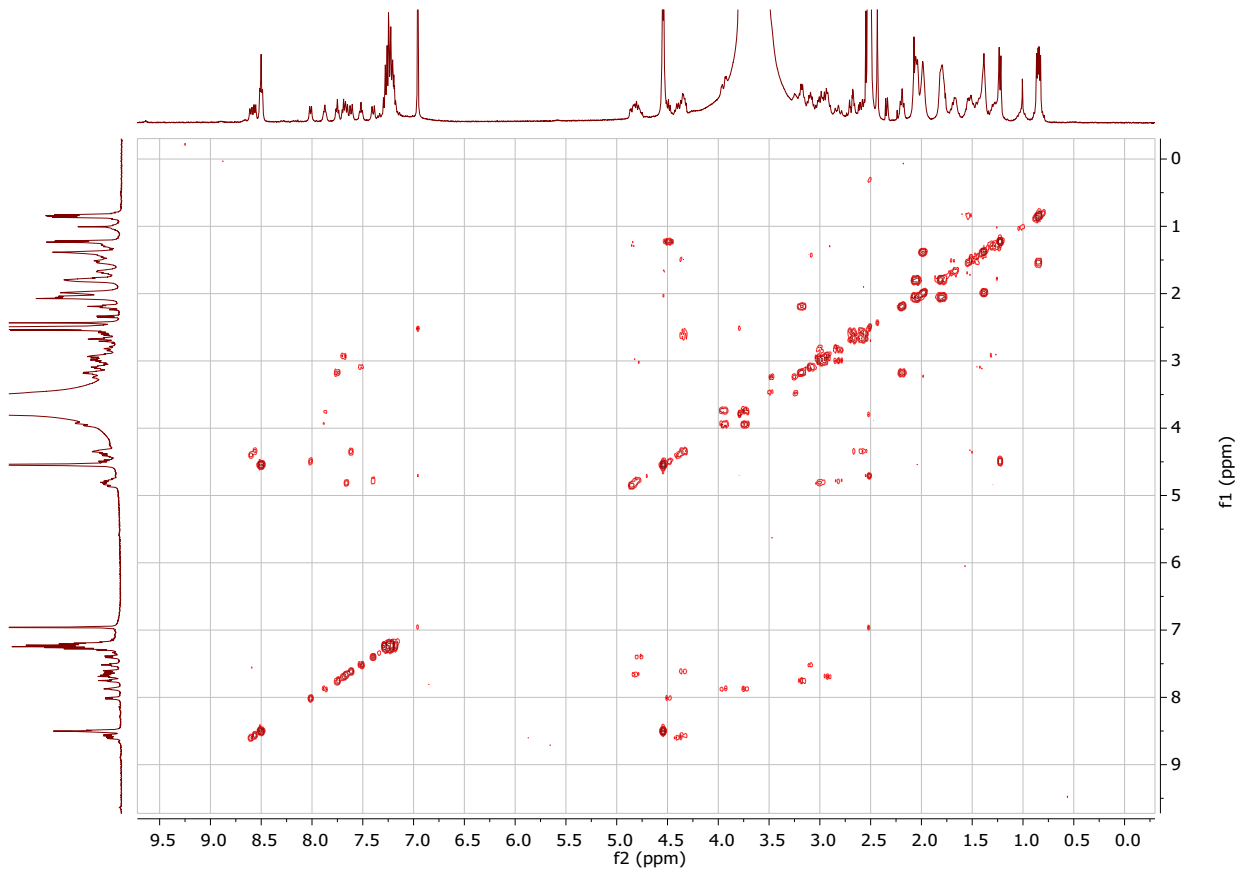

Figure S18. <sup>1</sup>H-<sup>1</sup>H COSY NMR of molecule 12



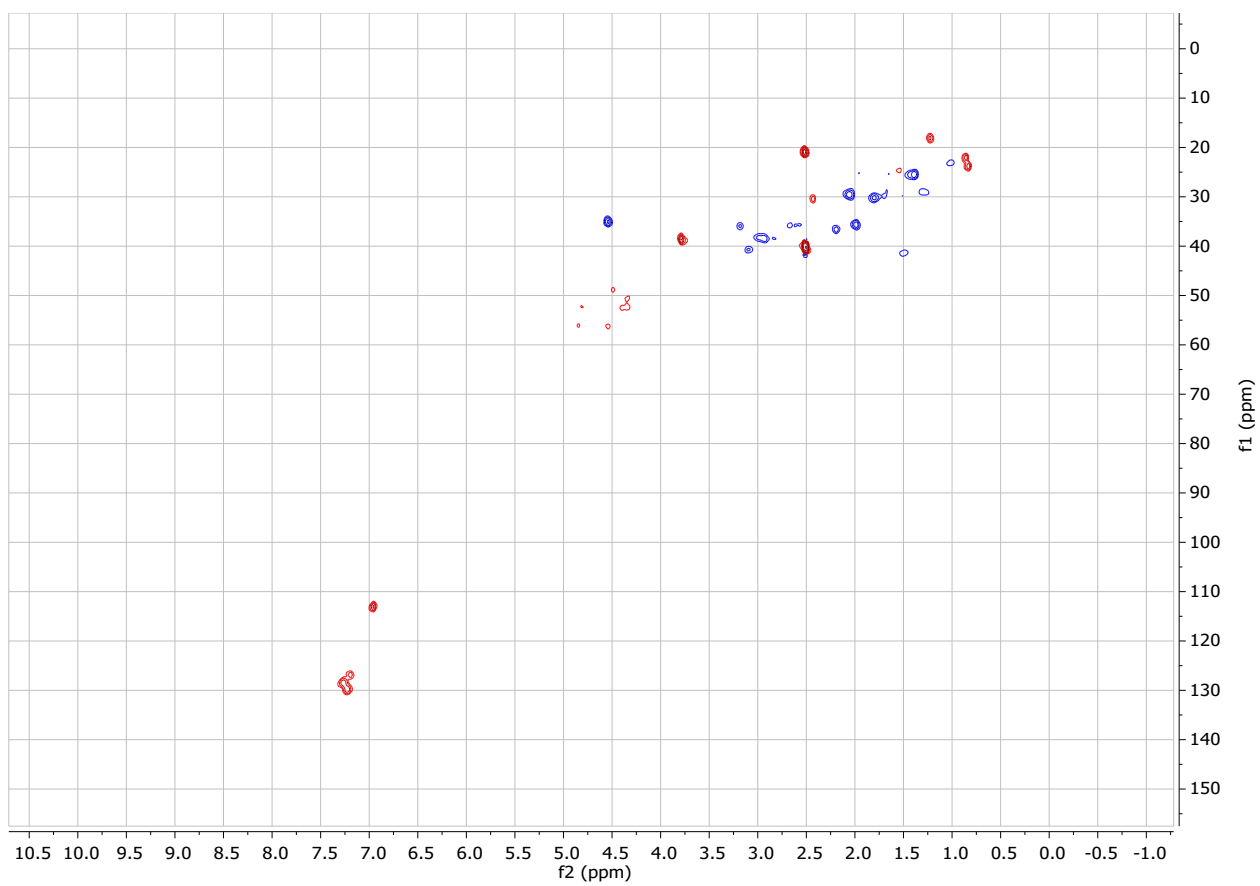

**Figure S19.**  $^1\text{H}$ - $^{13}\text{C}$  HSQC NMR of molecule **12**

**Table S1.** Nonlinear regression results and statistics for molecule **11**

|                            |                          |
|----------------------------|--------------------------|
| <b>Best-fit values</b>     |                          |
| Bottom                     | 0.06221                  |
| Top                        | 0.1267                   |
| LogIC50                    | -6.717                   |
| HillSlope                  | -1.239                   |
| IC50                       | 1.917e-007               |
| Span                       | 0.06445                  |
| <b>Std. Error</b>          |                          |
| Bottom                     | 0.01017                  |
| Top                        | 0.004453                 |
| LogIC50                    | 0.1982                   |
| HillSlope                  | 0.5820                   |
| Span                       | 0.01175                  |
| <b>95% CI (asymptotic)</b> |                          |
| Bottom                     | 0.04141 to 0.08300       |
| Top                        | 0.1175 to 0.1358         |
| LogIC50                    | -7.123 to -6.312         |
| HillSlope                  | -2.429 to -0.04897       |
| IC50                       | 7.541e-008 to 4.875e-007 |
| Span                       | 0.04041 to 0.08849       |
| <b>Goodness of Fit</b>     |                          |
| Degrees of Freedom         | 29                       |
| R squared                  | 0.7233                   |
| Sum of Squares             | 0.007329                 |
| Sy.x                       | 0.01590                  |

**Table S2.** Nonlinear regression results and statistics for molecule **12**

|                            |                          |
|----------------------------|--------------------------|
| <b>Best-fit values</b>     |                          |
| Bottom                     | 0.1165                   |
| Top                        | 0.3176                   |
| LogIC50                    | -6.580                   |
| HillSlope                  | -0.8516                  |
| IC50                       | 2.630e-007               |
| Span                       | 0.2012                   |
| <b>Std. Error</b>          |                          |
| Bottom                     | 0.04302                  |
| Top                        | 0.01334                  |
| LogIC50                    | 0.2904                   |
| HillSlope                  | 0.3994                   |
| Span                       | 0.04901                  |
| <b>95% CI (asymptotic)</b> |                          |
| Bottom                     | 0.02951 to 0.2034        |
| Top                        | 0.2906 to 0.3446         |
| LogIC50                    | -7.167 to -5.993         |
| HillSlope                  | -1.659 to -0.04442       |
| IC50                       | 6.808e-008 to 1.016e-006 |
| Span                       | 0.1021 to 0.3002         |
| <b>Goodness of Fit</b>     |                          |
| Degrees of Freedom         | 40                       |
| R squared                  | 0.6798                   |
| Sum of Squares             | 0.08743                  |
| Sy.x                       | 0.04675                  |
